# Supplementary material for: A conceptual translation of homogeneous catalysis into heterogeneous catalysis: homogeneous-like heterogeneous gold nanoparticle catalyst induced by ceria supporter
Source: Royal Society of Chemistry journal article supplement (doi:10.1039/c2nr33011c), 2012-11-30
Supplement: c2nr33011c.pdf [file c2nr33011c.pdf]

*Supplementary Information for*

**A Conceptual Translation of Homogeneous Catalysis into  
Heterogeneous Catalysis: Homogeneous-Like Heterogeneous Gold  
Nanoparticle Catalyst Induced by Ceria Supporter**

Zhen-Xing Li,<sup>a</sup> Wei Xue,<sup>a,c</sup> Bing-Tao Guan,<sup>b</sup> Fu-Bo Shi,<sup>a</sup> Zhang-Jie Shi<sup>\*b</sup> Hong Jiang<sup>\*a,c</sup> and  
Chun-Hua Yan<sup>\*a</sup>

<sup>a</sup> Beijing National Laboratory for Molecular Sciences, State Key Laboratory of Rare Earth Materials  
Chemistry and Applications, PKU-HKU Joint Laboratory on Rare Earth Materials and Bioinorganic  
Chemistry, Peking University, Beijing 100871, China.

<sup>b</sup> Key Laboratory of Bioorganic Chemistry and Molecular Engineering of Ministry of Education, College of  
Chemistry and Molecular Engineering, Peking University, Beijing 100871, China.

<sup>c</sup> Institute of Theoretical and Computational Chemistry, Peking University, Beijing 100871, China.

\* To whom correspondence should be addressed. E-mail: yan@pku.edu.cn (C.H.Y.); zshi@pku.edu.cn  
(Z.J.S.); h.jiang@pku.edu.cn (H.J.)

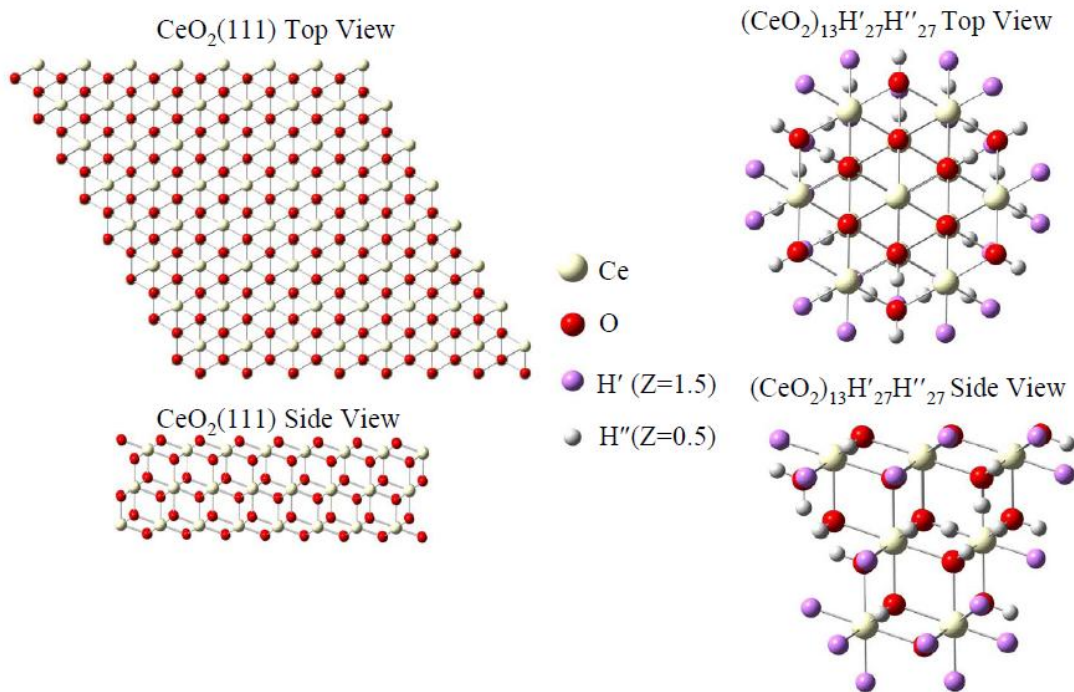

**Figure S1.** To mimic the properties of  $\text{CeO}_2(111)$  surface using  $(\text{CeO}_2)_{13}\text{H}'_{27}\text{H}''_{27}$  cluster model, in which  $\text{H}'$  and  $\text{H}''$  are the pseudo-hydrogens with the corresponding fractional charge in parentheses.

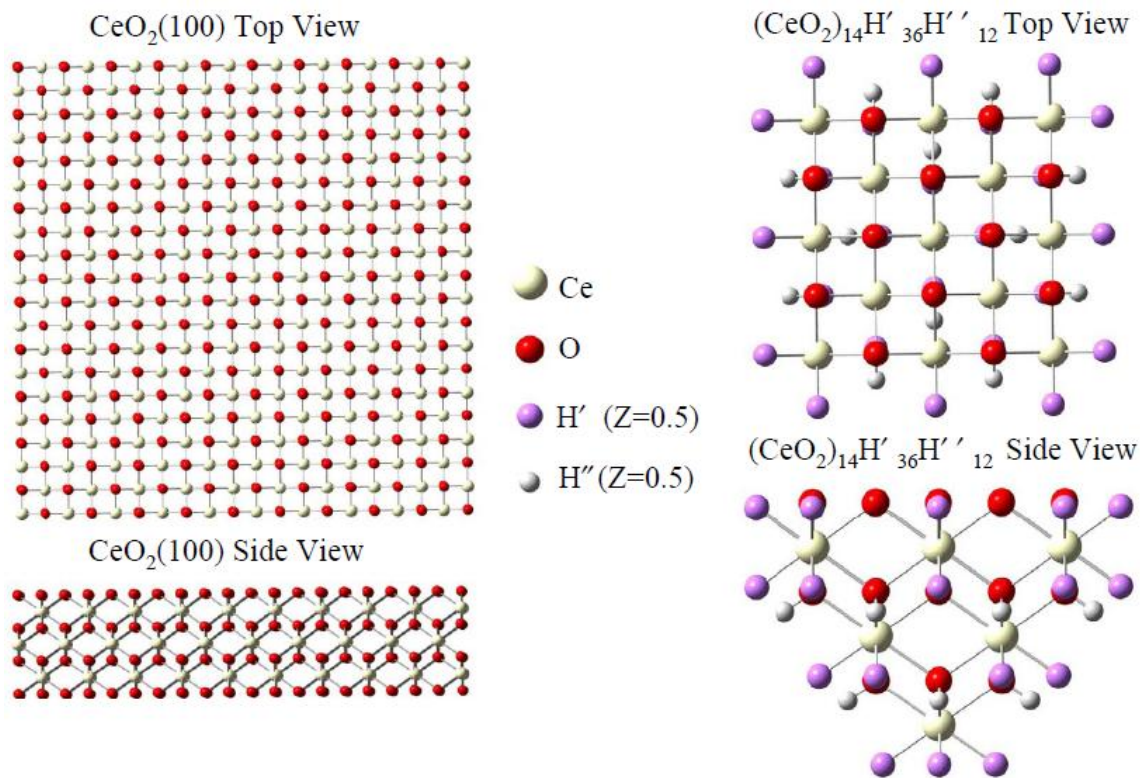

**Figure S2.**  $(\text{CeO}_2)_{14}\text{H}'_{36}\text{H}''_{12}$  cluster model mimicking  $\text{CeO}_2(100)$  surface.

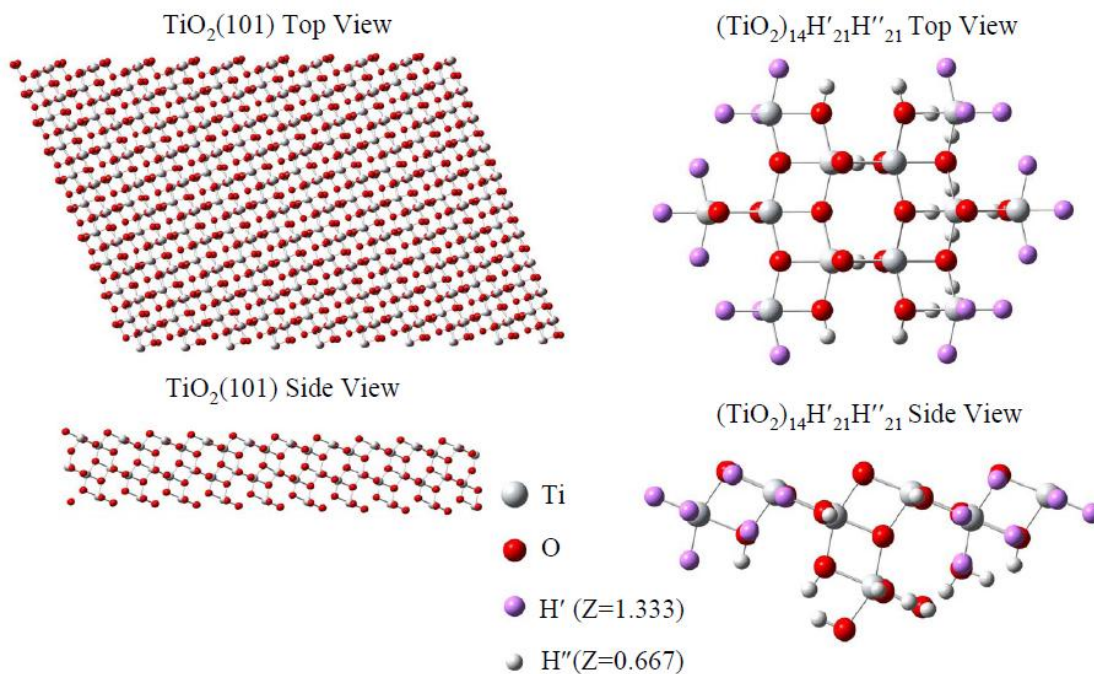

**Figure S3.**  $(\text{TiO}_2)_{14}\text{H}'_{21}\text{H}''_{21}$  cluster model mimicking anatase(101) surface.

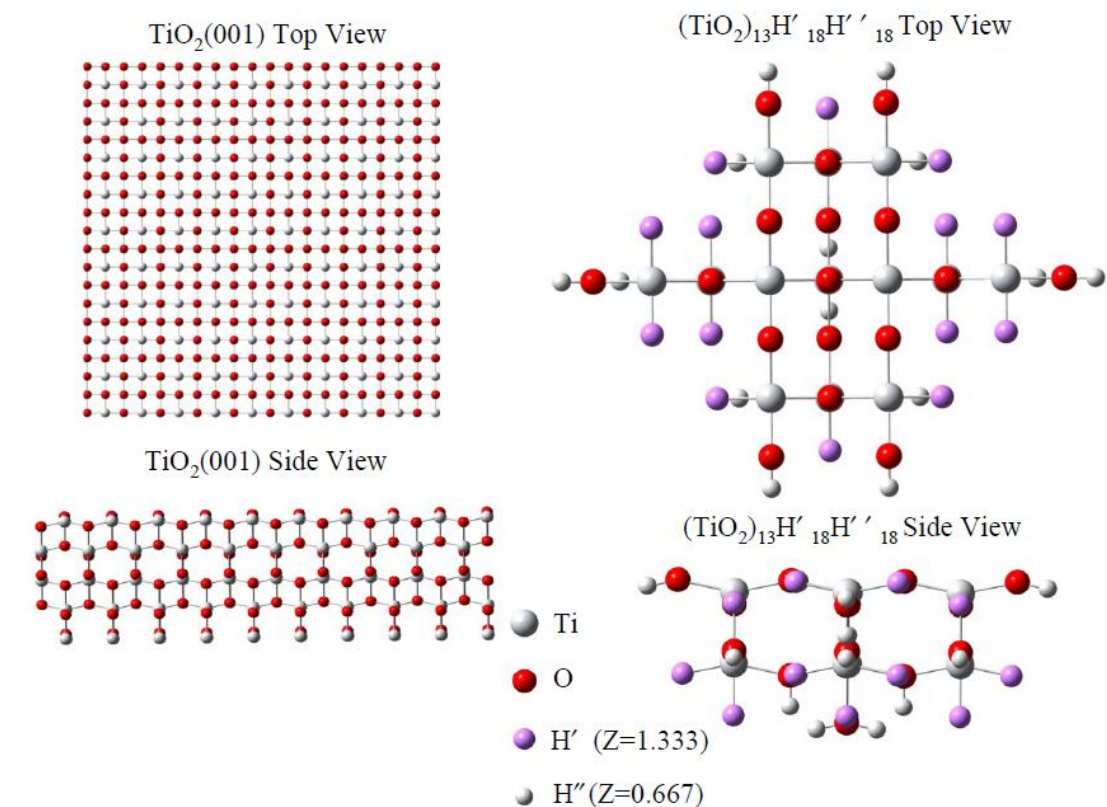

**Figure S4.** (TiO<sub>2</sub>)<sub>13</sub>H'<sub>18</sub>H''<sub>18</sub> cluster model mimicking anatase(001) surface.

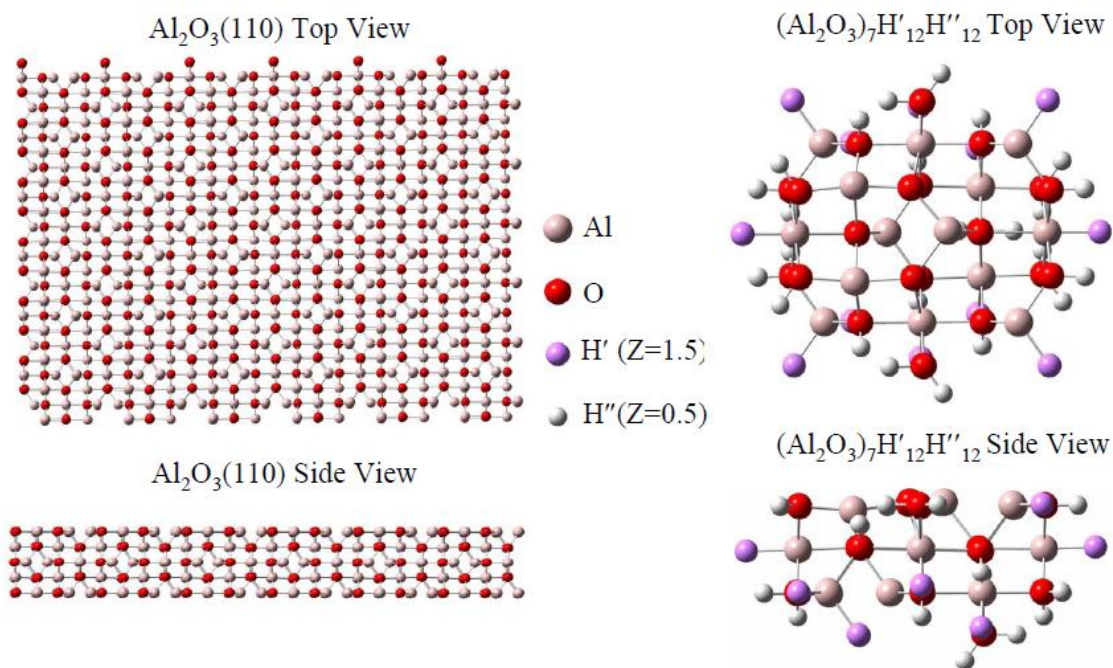

**Figure S5.** (Al<sub>2</sub>O<sub>3</sub>)<sub>7</sub>H'<sub>12</sub>H''<sub>12</sub> cluster model mimicking  $\gamma$ -Al<sub>2</sub>O<sub>3</sub>(110) surface.



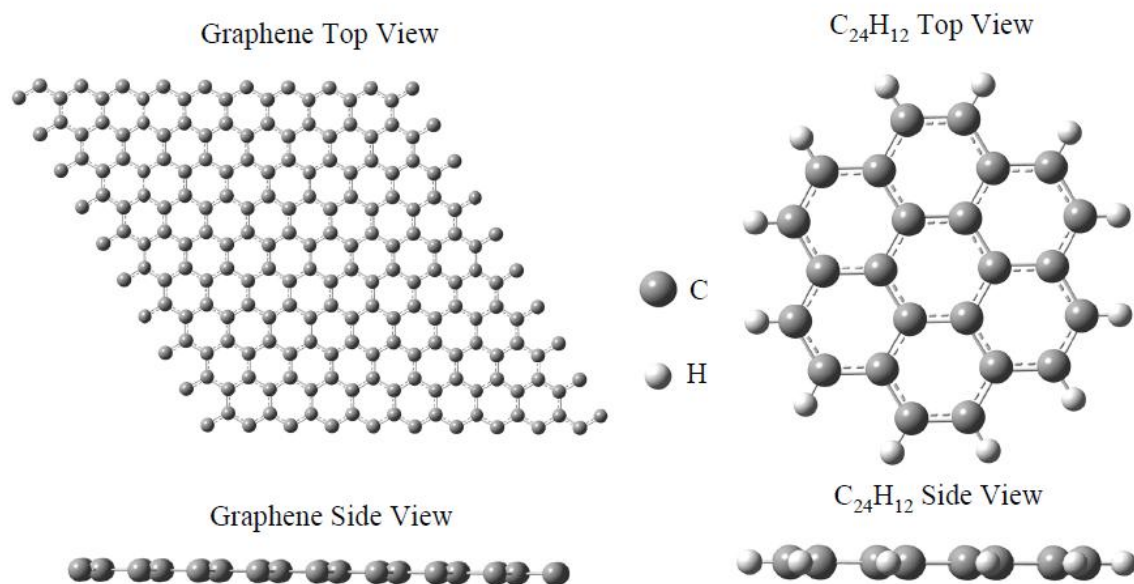

**Figure S6.**  $C_{24}H_{12}$  cluster model mimicking graphene.

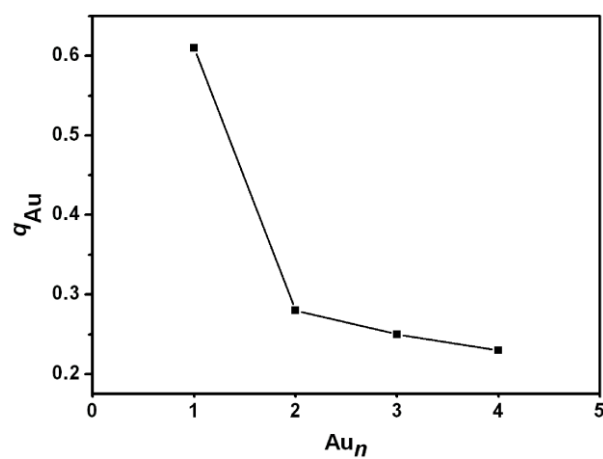

**Figure S7.** The average charge state of gold atom in  $Au_n$  ( $n = 2 - 4$ ) clusters on  $(CeO_2)_{14}H'_{36}H''_{12}$  cluster.

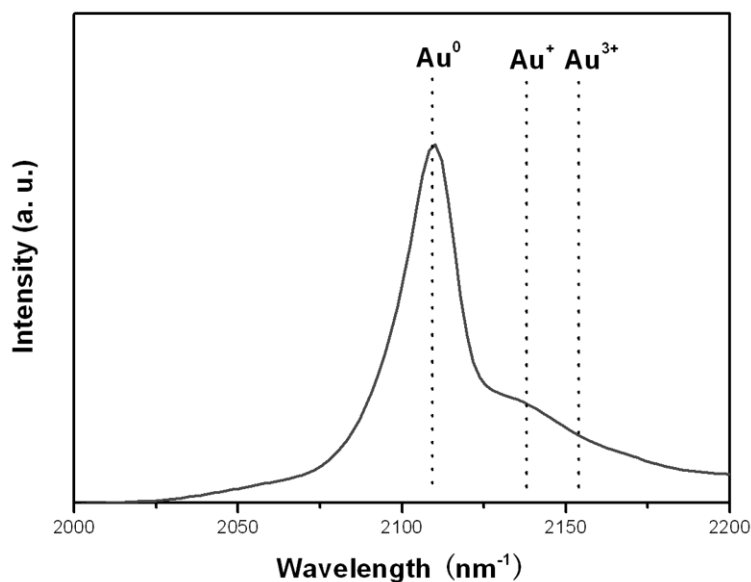

**Figure S8.** FTIR spectra of CO adsorbed on gold supported on CeO<sub>2</sub> nanocube at a CO pressure of 30 Torr and at room temperature.

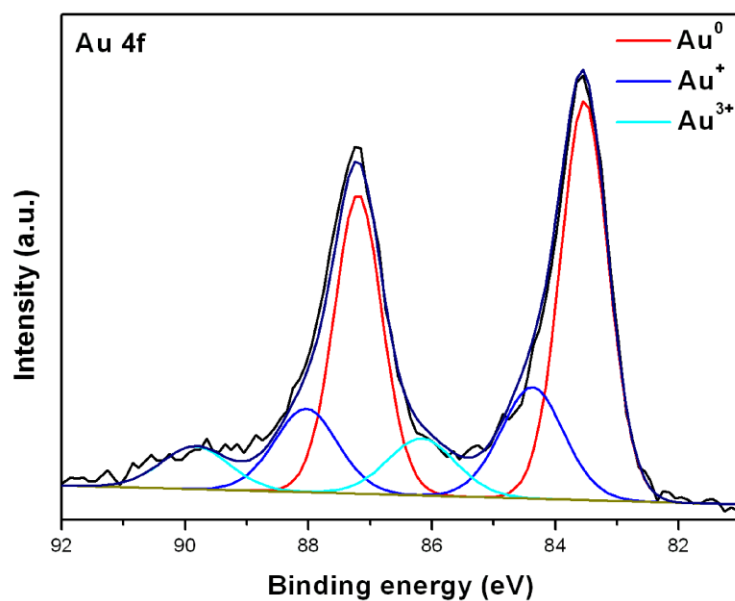

**Figure S9.** X-ray photoelectron spectroscopic scan survey in the region of Au 4d of gold supported on CeO<sub>2</sub> nanocube.

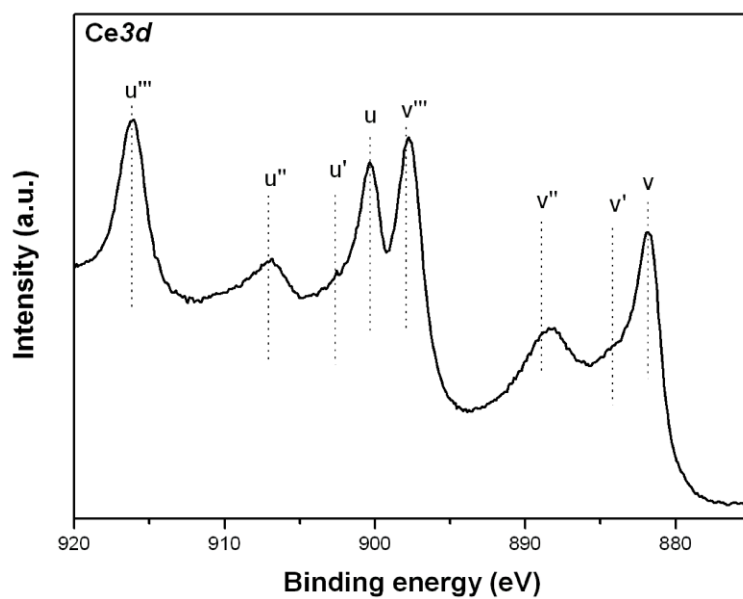

**Figure S10.** X-ray photoelectron spectroscopic scan survey in the region of Ce 3d of gold supported on CeO<sub>2</sub> nanocube.

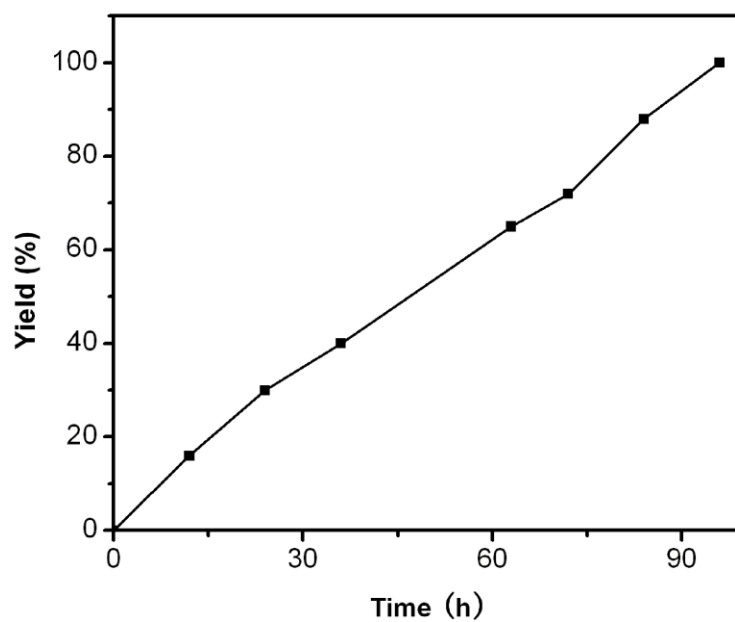

**Figure S11.** The reaction yield as a function of time for Au/CeO<sub>2</sub> nanocube catalysts.

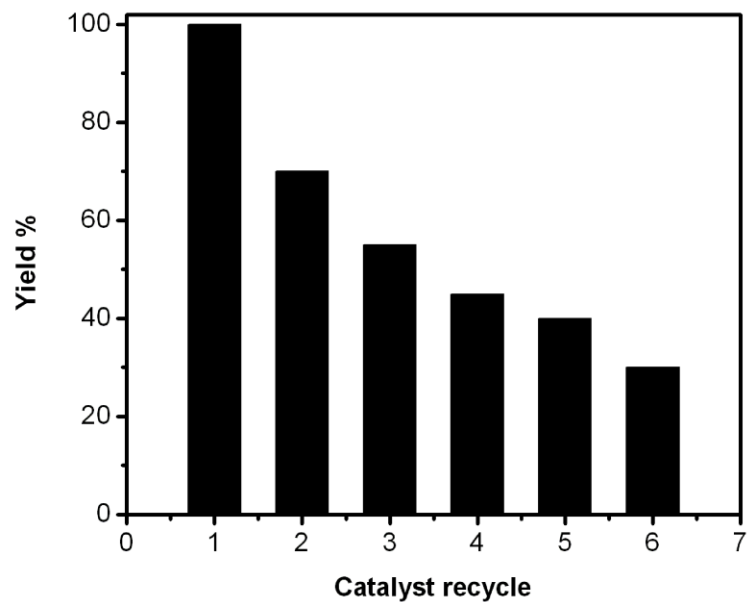

**Figure S12.** Au/CeO<sub>2</sub> nanocube catalysts for cycloisomerizations of enynes after different uses.

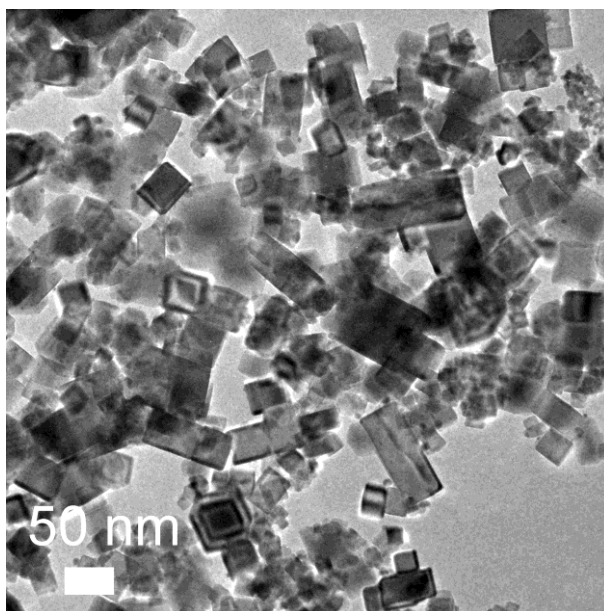

**Figure S13.** Transmission electron microscope (TEM) images of Au/CeO<sub>2</sub> nanocubes after the reaction. No leaching or aggregation is observed.

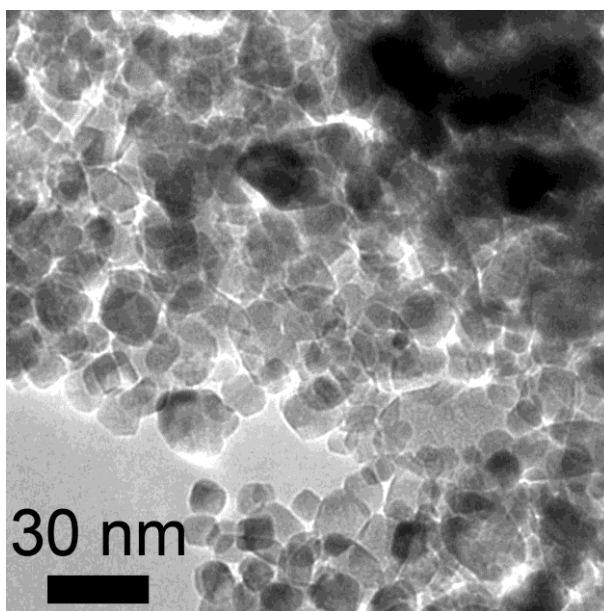

**Figure S14.** Transmission electron microscope (TEM) images of Au/TiO<sub>2</sub> nanoparticles.

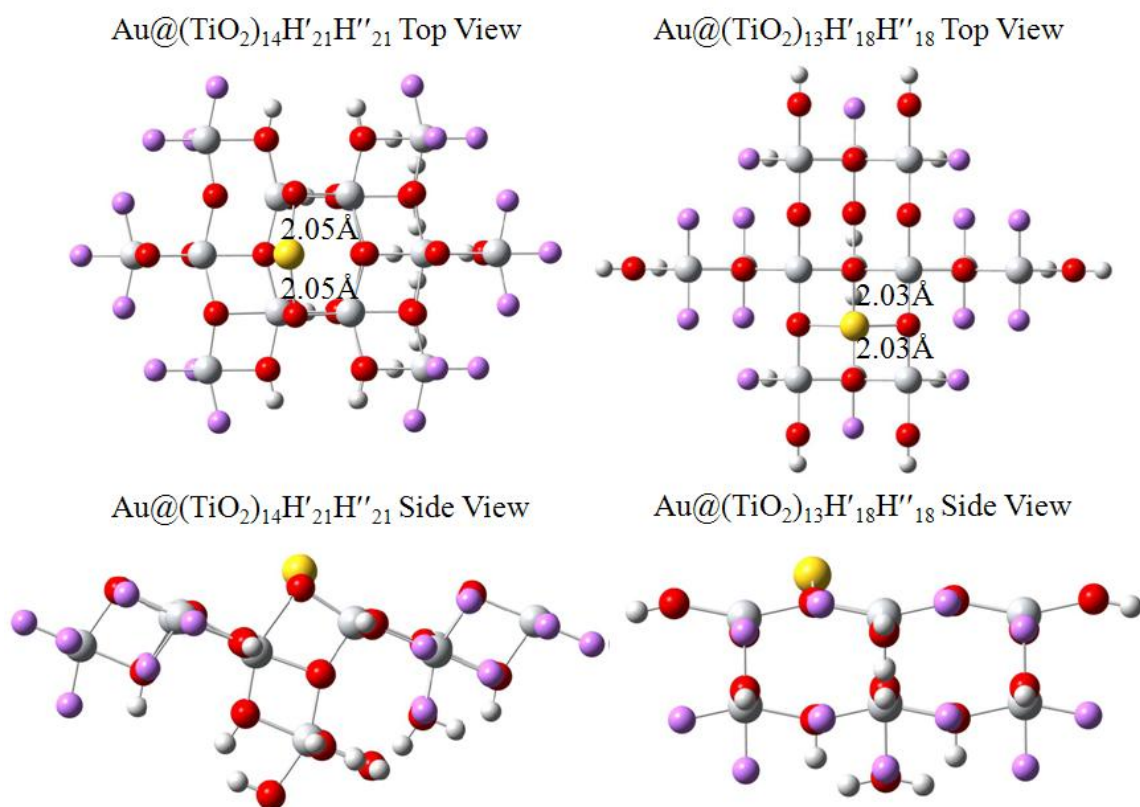



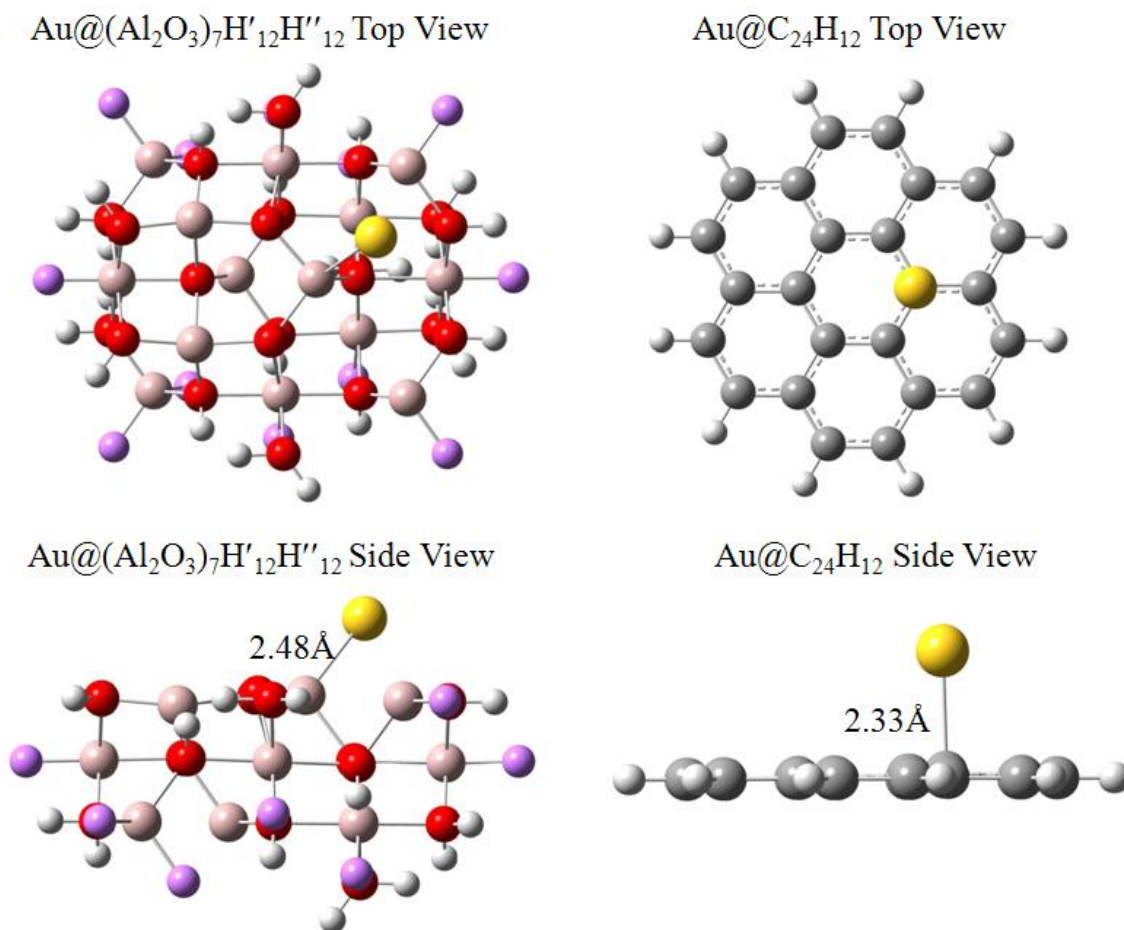

**Figure S15.** Calculated structures of a Au adsorption at  $\text{TiO}_2(101)$ ,  $\text{TiO}_2(001)$ ,  $\gamma\text{-Al}_2\text{O}_3(110)$  and the surface of monolayer GP.

**Table S1** The chemisorption energies of carbon monoxide on  $(\text{CeO}_2)_{13}\text{H}'_{27}\text{H}''_{27}$  cluster, comparing to the data in the references.

| Model             | Method | Site    | $r(\text{C-Ce})/\text{\AA}$ | $E_{\text{ads}}/\text{eV}$ | Reference                                                                 |
|-------------------|--------|---------|-----------------------------|----------------------------|---------------------------------------------------------------------------|
| Slab              | PW91   | atop Ce | 2.86                        | -0.17                      | Yang, Z. et al. <i>Chem. Phys. Lett.</i> <b>2004</b> , 396, 384.          |
| Slab              | PW91+U | atop Ce | 2.86                        | -0.26                      | Nolan, M. et al. <i>Surf. Sci.</i> <b>2006</b> , 600, L175.               |
| Slab              | PW91+U | atop Ce | 2.88                        | -0.26                      | Nolan, M. et al. <i>J. Phys. Chem. B</i> <b>2006</b> , 110, 16600.        |
| Slab              | PBE+U  | atop Ce | 2.86                        | -0.17                      | Huang, M. et al. <i>J. Phys. Chem. C</i> <b>2008</b> , 112, 8643.         |
| Slab              | PW91+U | atop Ce | 2.91                        | -0.18                      | Jiang, S. Y. et al. <i>Acta Phys. -Chim. Sin.</i> <b>2009</b> , 25, 1629. |
| Embedded Cluster  | LDA    | atop Ce | 2.856                       | -0.54                      | Müller, C. et al. <i>Surf. Sci.</i> <b>2009</b> , 603, 2619.              |
|                   | Exp.   |         |                             | ~-0.2                      | Zaki, M. et al. <i>Spectrochim. Acta</i> <b>1987</b> , 43A, 1455.         |
| Saturated Cluster | LDA    | atop Ce | 2.73                        | <b>-0.46</b>               | This work                                                                 |

**Table S2** The vibrations of carbon monoxide on  $(\text{CeO}_2)_{13}\text{H}'_{27}\text{H}''_{27}$  cluster, comparing to the data in the references.

| Model             | Method | Site    | $\nu(\text{C-O})_{\text{model}}/\text{cm}^{-1}$ | $\nu(\text{C-O})_{\text{gas}}/\text{cm}^{-1}$ | Reference                                                                 |
|-------------------|--------|---------|-------------------------------------------------|-----------------------------------------------|---------------------------------------------------------------------------|
|                   | Exp.   |         |                                                 | 2143                                          | Street, S.C. et al. <i>Ann. Rev. Phys. Chem.</i> <b>1997</b> , 48, 43.    |
|                   | Exp.   |         |                                                 | 2148                                          | Reinhardt, P. A. et al. <i>Phys. Rev. B</i> <b>1996</b> , 54, 14812.      |
|                   | Exp.   |         | 2165                                            |                                               | Bensalem, A. et al. <i>Appl. Catal. A-Gen.</i> <b>1995</b> , 121, 81.     |
|                   | Exp.   |         | 2177                                            |                                               | Li, C. et al. <i>J. Chem. Soc. Faraday Trans.</i> <b>1989</b> , 185, 929. |
| Slab              | PW91   | atop Ce | 2082                                            | 2076                                          | Yang, Z. et al. <i>Chem. Phys. Lett.</i> <b>2004</b> , 396, 384.          |
| Slab              | PW91+U | atop Ce | 2128                                            | 2103                                          | Nolan, M. et al. <i>Surf. Sci.</i> <b>2006</b> , 600, L175.               |
| Saturated Cluster | LDA    | atop Ce | 2127                                            | 2124                                          | This work                                                                 |

**Table S3.** The state of charge of gold atom on  $(\text{CeO}_2)_{13}\text{H}'_{27}\text{H}''_{27}$  cluster.

| Model             | Method | Site     | $q_{\text{Au}}$ | $E_{\text{ads}}/\text{eV}$ | Reference                                                                      |
|-------------------|--------|----------|-----------------|----------------------------|--------------------------------------------------------------------------------|
| Slab              | PW91+U | bridge O | +0.33           | -1.15                      | Hernandez, N. C. et al. <i>Phys. Chem. Chem. Phys.</i> <b>2009</b> , 11, 5246. |
| Slab              | PW91+U | bridge O | +0.32           | -1.17                      | Zhang, C. J. et al. <i>J. Chem. Phys.</i> <b>2008</b> , 129, 194708.           |
| Slab              | PBE    | atop O   | +0.35           | -1.26                      | Liu, Z. P. et al. <i>Phys. Rev. Lett.</i> <b>2005</b> , 94, 196102.            |
| Saturated Cluster | LDA    | atop O   | +0.28           | -1.44                      | This work                                                                      |

**Table. S4.** Gold loading and XPS Au4f peak analyses for Au on  $\text{CeO}_2$ ,  $\text{TiO}_2$ ,  $\text{Al}_2\text{O}_3$ , C and grapheme.

| Entry | Catalyst                    | Au (wt %) | XPS Au4f peak |               |                  |
|-------|-----------------------------|-----------|---------------|---------------|------------------|
|       |                             |           | $\text{Au}^0$ | $\text{Au}^+$ | $\text{Au}^{3+}$ |
| 1     | Au/ $\text{CeO}_2$          | 1.1       | 64%           | 23%           | 13%              |
| 2     | Au/ $\text{TiO}_2$          | 1.3       | 73%           | 14%           | 13%              |
| 3     | Au/ $\text{Al}_2\text{O}_3$ | 1.2       | 83%           | 9%            | 8%               |
| 4     | Au/C                        | 0.9       | 85%           | 10%           | 5%               |
| 5     | Au/GP                       | 0.9       | 100%          | —             | —                |

**Table S5.** The charge state distribution of gold atom on the  $\text{CeO}_2$  (100),  $\text{TiO}_2$ (101),  $\text{TiO}_2$ (001),  $\gamma$ - $\text{Al}_2\text{O}_3$ (110) and the surface of monolayer GP.

| Support                       | Model                                                    | Site     | $r(\text{Au-O/Al/C})/\text{\AA}$ | $q_{\text{Au}}$ |
|-------------------------------|----------------------------------------------------------|----------|----------------------------------|-----------------|
| $\text{CeO}_2$ (100)          | $(\text{CeO}_2)_{14}\text{H}'_{36}\text{H}''_{12}$       | hollow O | 1.95                             | +0.61           |
| $\text{TiO}_2$ (101)          | $(\text{TiO}_2)_{14}\text{H}'_{21}\text{H}''_{21}$       | bridge O | 2.05                             | +0.32           |
| $\text{TiO}_2$ (001)          | $(\text{TiO}_2)_{13}\text{H}'_{18}\text{H}''_{18}$       | bridge O | 2.03                             | +0.31           |
| $\text{Al}_2\text{O}_3$ (110) | $(\text{Al}_2\text{O}_3)_7\text{H}'_{12}\text{H}''_{12}$ | atop Al  | 2.48                             | +0.10           |
| GP                            | $\text{C}_{24}\text{H}_{12}$                             | atop C   | 2.33                             | +0.03           |
